# Supplementary material
Source: Springer Nature journal article supplement (https://www.springermedizin.de/resource/supplementary/10194_2012_253_MOESM3_ESM.pdf/9422632)

SDS score (95% C.I.)

8  
6  
4  
2  
0

None

Primary\*

Secondary

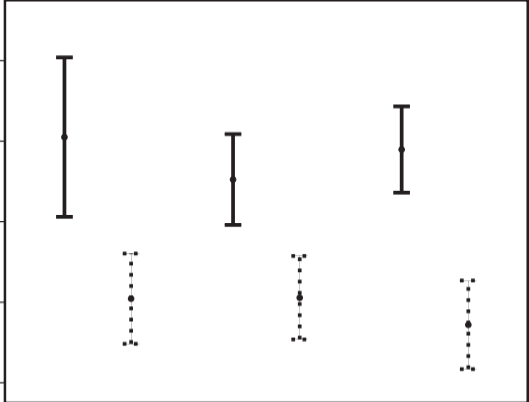

Supplement: MOESM3 [file 9422632]
